# Supplementary material for: What Is the Significance of Indeterminate Pulmonary Nodules in High-Grade Soft Tissue Sarcomas? A Retrospective Cohort Study
Source: MDPI journal article supplement (doi:10.3390/cancers15133531), 2023-07-07
Supplement: s1 [file s1]

Supplementary Table S1: Clinical details of patients with IPNs at diagnosis progressing to lung metastases. \* indicates still alive.

| Age at<br>Diagnosis | Site of<br>Primary | Histological<br>Subtype | Max Tumour<br>Grade | Depth<br>Dimension<br>(cm) | Relative to<br>the Fascia | More<br>than<br>1<br>IPN? | Bilateral<br>Distribution? | IPN 5<br>mm or<br>Greater<br>in Size? | Time to<br>Progression<br>(days) | How was Progression of IPN Detected                                                   | Lung<br>Metastasis<br>Resected? | Survival<br>(days) |
|---------------------|--------------------|-------------------------|---------------------|----------------------------|---------------------------|---------------------------|----------------------------|---------------------------------------|----------------------------------|---------------------------------------------------------------------------------------|---------------------------------|--------------------|
| 68                  | Lower limb         | Synovial sarcoma        | 2                   | 32                         | Deep                      | Yes                       | Yes                        | Yes                                   | 13                               | Progression detected on CTPA for post-operative PE                                    | No                              | 231                |
| 84                  | Lower limb         | leiomyosarcoma          | 3                   | 10                         | Deep                      | Yes                       | Yes                        | Yes                                   | 146                              | Progression identified on interval CT at 3 months                                     | No                              | 381                |
| 83                  | Lower limb         | UPS                     | 3                   | 12                         | Deep                      | Yes                       | No                         | Yes                                   | 479                              | Identified on CXR when admitted unwell, confirmed with CT                             | No                              | 570                |
| 62                  | Lower limb         | leiomyosarcoma          | 3                   | 8                          | Deep                      | Yes                       | Yes                        | No                                    | 444                              | Identified on routine surveillance CXR, confirmed with CT                             | No                              | 783                |
| 87                  | Upper limb         | Rhabdomyosarcoma        | 3                   | 5                          | Superficial               | Yes                       | Yes                        | No                                    | 132                              | Progression identified on interval CT at 3 months                                     | No                              | 252                |
| 66                  | Lower limb         | Rhabdomyosarcoma        | 3                   | 10                         | Deep                      | Yes                       | Yes                        | Yes                                   | 54                               | Progression seen on CTPA conducted during post operative stay for shortness of breath | No                              | 67                 |
| 76                  | Lower limb         | UPS                     | 3                   | 19                         | Superficial               | No                        | -                          | No                                    | 285                              | Identified on routine surveillance CXR, confirmed with CT                             | No                              | 710                |
| 67                  | Lower limb         | Liposarcoma             | 3                   | 14                         | Deep                      | No                        | -                          | Yes                                   | 80                               | Progression identified on interval CT at 3 months                                     | No                              | 244                |
| 84                  | Lower limb         | UPS                     | 3                   | 9.7                        | Deep                      | Yes                       | No                         | Yes                                   | 143                              | Progression identified on interval CT at 6 months                                     | No                              | 203                |
| 59                  | Lower limb         | Leiomyosarcoma          | 3                   | 9.5                        | Deep                      | Yes                       | Yes                        | No                                    | 238                              | Progression identified on restaging CT for liver metastases                           | No                              | 602                |
| 63                  | Lower limb         | Leiomyosarcoma          | 3                   | 10                         | Deep                      | No                        | -                          | No                                    | 383                              | Progression identified on interval CT at 12 months                                    | Yes                             | 798                |
| 76                  | Lower limb         | UPS                     | 3                   | 6.5                        | Superficial               | No                        | -                          | No                                    | 299                              | Progression identified on restaging CT for groin metastases                           | No                              | 327                |
| 11                  | Lower limb         | Alveolar Soft Parts     | 2                   | 2.7                        | Deep                      | Yes                       | Yes                        | No                                    | 103                              | Progression identified on interval CT at 3 months                                     | Yes                             | 2252 *             |
| 63                  | Lower limb         | MPNST                   | 3                   | 20                         | Deep                      | No                        | -                          | Yes                                   | 209                              | Progression identified on interval CT to monitor response of other mets to chemo      | No                              | 209                |
| 32                  | Lower limb         | UPS                     | 3                   | 11.4                       | Deep                      | Yes                       | Yes                        | Yes                                   | 83                               | Progression identified on interval CT at 3 months                                     | No                              | 83                 |
| 69                  | Lower limb         | Leiomyosarcoma          | 3                   | 9.3                        | Deep                      | Yes                       | No                         | No                                    | 131                              | Identified on routine surveillance CXR, confirmed with CT                             | No                              | 445                |
| 52                  | Chest wall         | MPNST                   | 3                   | 7.3                        | Deep                      | Yes                       | Yes                        | Yes                                   | 146                              | Identified on CT when admitted for breathlessness                                     | No                              | 189                |
| 73                  | Lower limb         | UPS                     | 3                   | 12                         | Deep                      | No                        | -                          | Yes                                   | 171                              | Identified on routine surveillance CXR, confirmed with CT                             | No                              | 185                |
| 55                  | Lower limb         | Rhabdomyosarcoma        | 3                   | 14.5                       | Deep                      | Yes                       | Yes                        | Yes                                   | 66                               | Identified on CT when admitted for breathlessness                                     | No                              | 66                 |
| 75                  | Breast             | Angiosarcoma            | 3                   | 24.5                       | Superficial               | Yes                       | No                         | No                                    | 18                               | Identified on CT for new pleural effusion                                             | No                              | 23                 |
| 56                  | Lower limb         | UPS                     | 3                   | 13.3                       | Deep                      | Yes                       | Yes                        | Yes                                   | 73                               | Identified on routine surveillance CXR, confirmed with CT                             | No                              | 112                |
| 69                  | Breast             | Angiosarcoma            | 3                   | 1.1                        | Superficial               | No                        | -                          | Yes                                   | 489                              | Progression seen on CTPA for potential PE                                             | No                              | 554                |
| 57                  | Lower limb         | UPS                     | 3                   | 4.3                        | Superficial               | No                        | -                          | No                                    | 260                              | Progression identified on restaging CT for recurrence                                 | No                              | 511                |
| 69                  | Chest wall         | UPS                     | 3                   | 12.5                       | Superficial               | No                        | -                          | Yes                                   | 22                               | Progression seen on CT for persistent post-op pleural effusion                        | No                              | 34                 |
| 70                  | Chest wall         | UPS                     | 3                   | 14                         | Deep                      | Yes                       | Yes                        | Yes                                   | 88                               | Progression seen on interval CT at 2 months                                           | 178                             |                    |
| 67                  | Trunk              | UPS                     | 3                   | 16.5                       | Deep                      | Yes                       | Yes                        | Yes                                   | 557                              | Identified on routine surveillance CXR, confirmed with CT                             | No                              | 840                |
| 80                  | Lower limb         | UPS                     | 3                   | 5.8                        | Deep                      | Yes                       | Yes                        | No                                    | 126                              | Progression identified on CT following pleural effusion on CXR                        | No                              | 182                |
